# Supplementary material
Source: PubMed Central journal article supplement (PMC3711129)

**FIGURE S1**

**Ubiquitin**

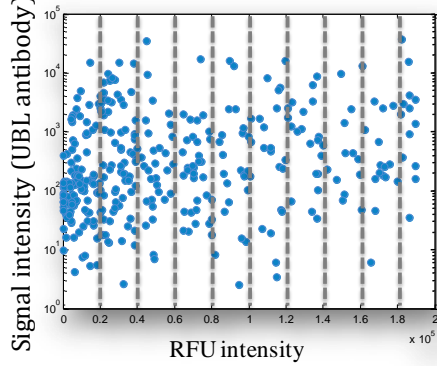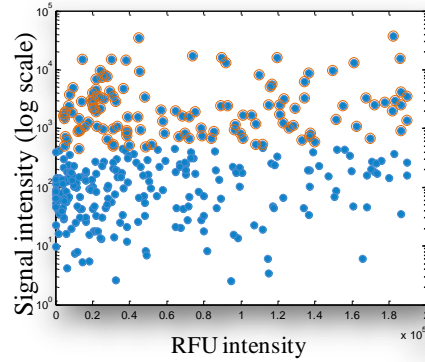

**Calculate mean reactivity and SD for each bin**

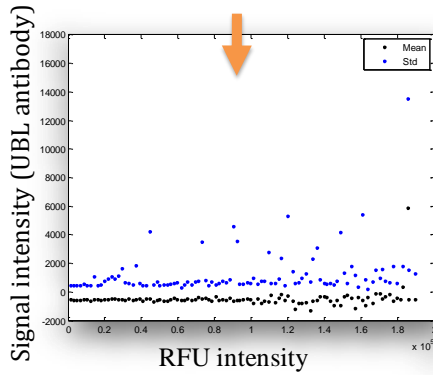

**Selecting the proteins with  $p < 0.05$**

**Assigning p-values for each protein based on its median reactivity and distance from the mean and std of all proteins in the same reactivity range**

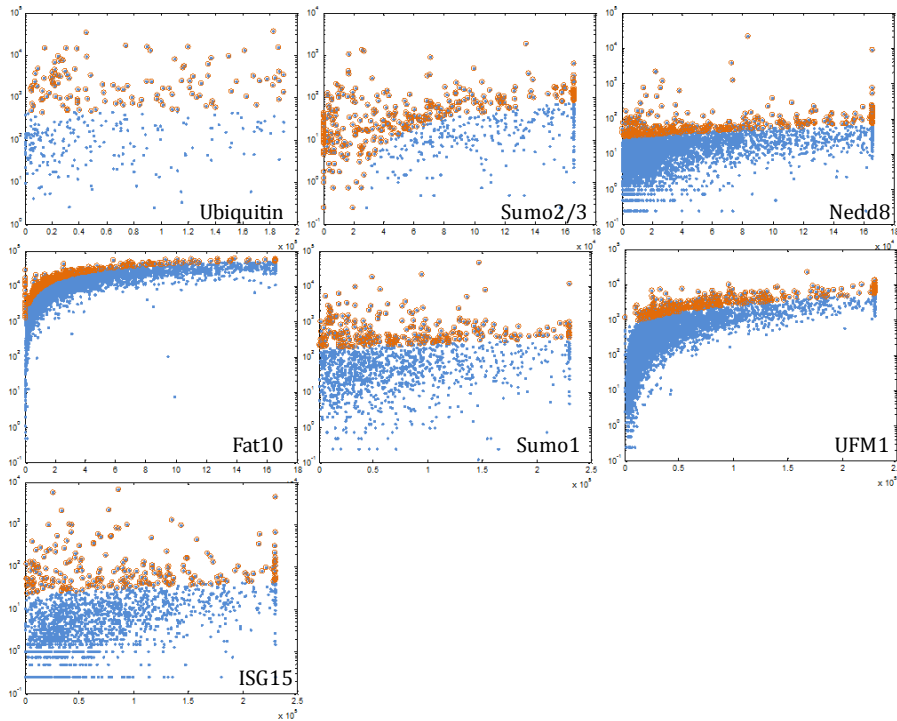

Supplement: NIHMS481761-supplement-s1.pdf [file NIHMS481761-supplement-s1.pdf]
