# Supplementary material
Source: PubMed Central journal article supplement (PMC3711129)

**FIGURE S4**

**A**

Comparison of signal intensity values of FAT10 targets using detection by two different antibodies (x-axis: PW9680, y-axis: PW9585).

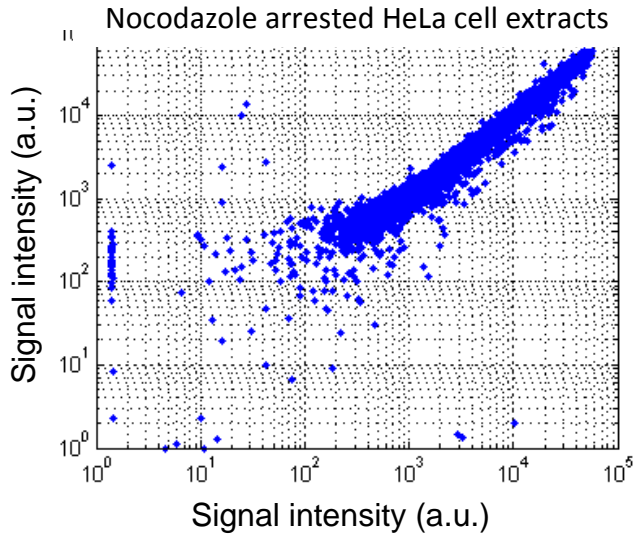

**B**

Comparison of signal intensity values of FAT10 targets with (x-axis) and without (y-axis) 0.5% SDS wash.

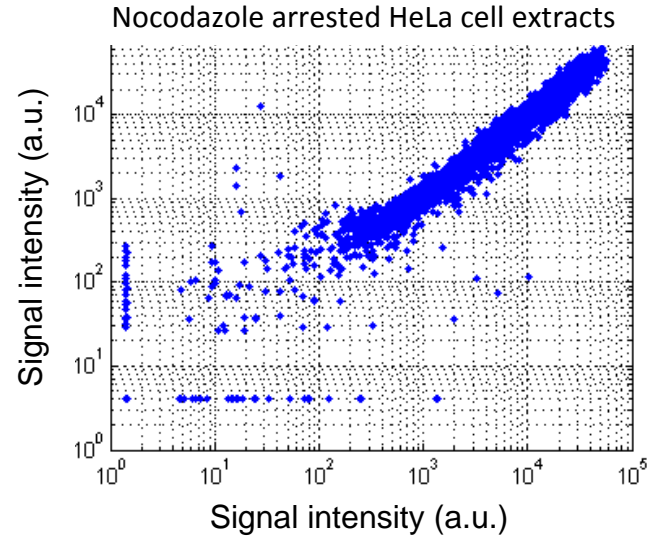

Supplement: NIHMS481761-supplement-s4.pdf [file NIHMS481761-supplement-s4.pdf]
