# Supplementary material
Source: PubMed Central journal article supplement (PMC3711129)

**FIGURE S5**

**A**

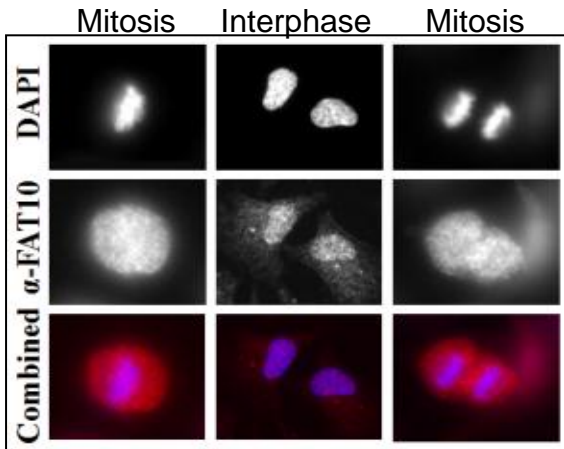

**B**

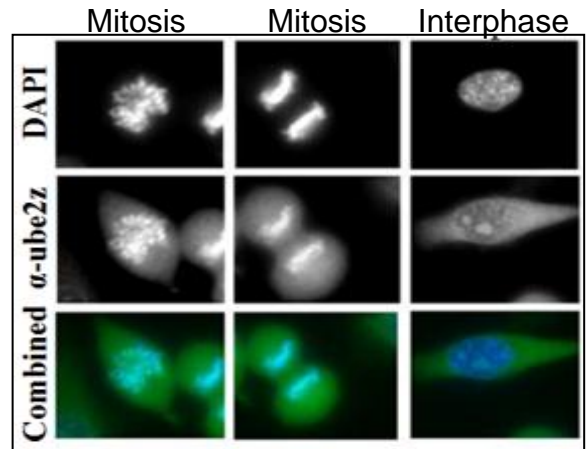

**C**

**Release from double thymidine block**

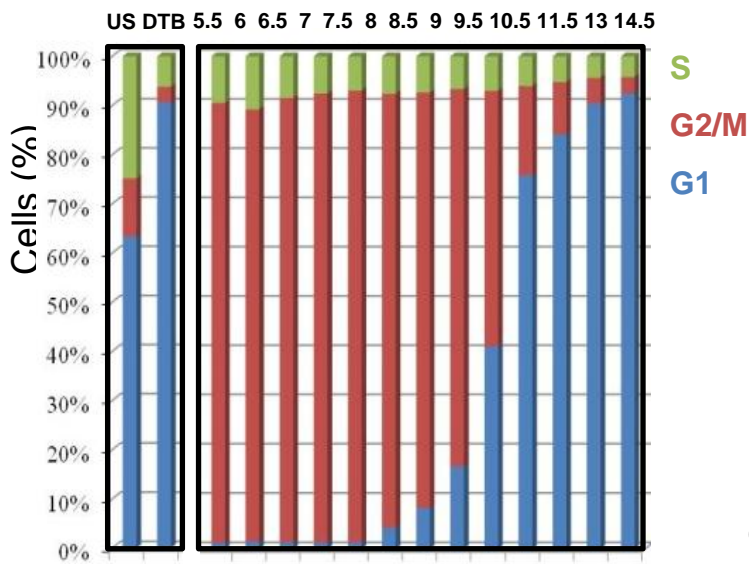

**D**

**Time after release from double thymidine block (hours)**

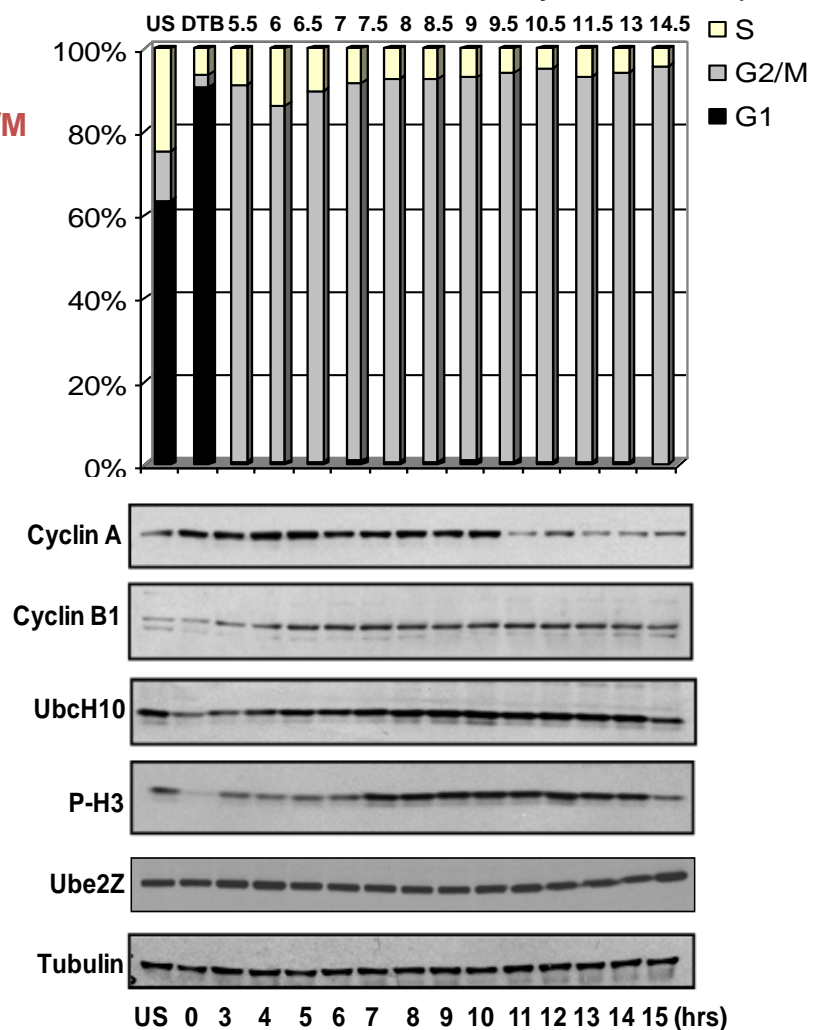

Supplement: NIHMS481761-supplement-s5.pdf [file NIHMS481761-supplement-s5.pdf]
