# Supplementary material
Source: PubMed Central journal article supplement (PMC3711129)

FIGURE S2A

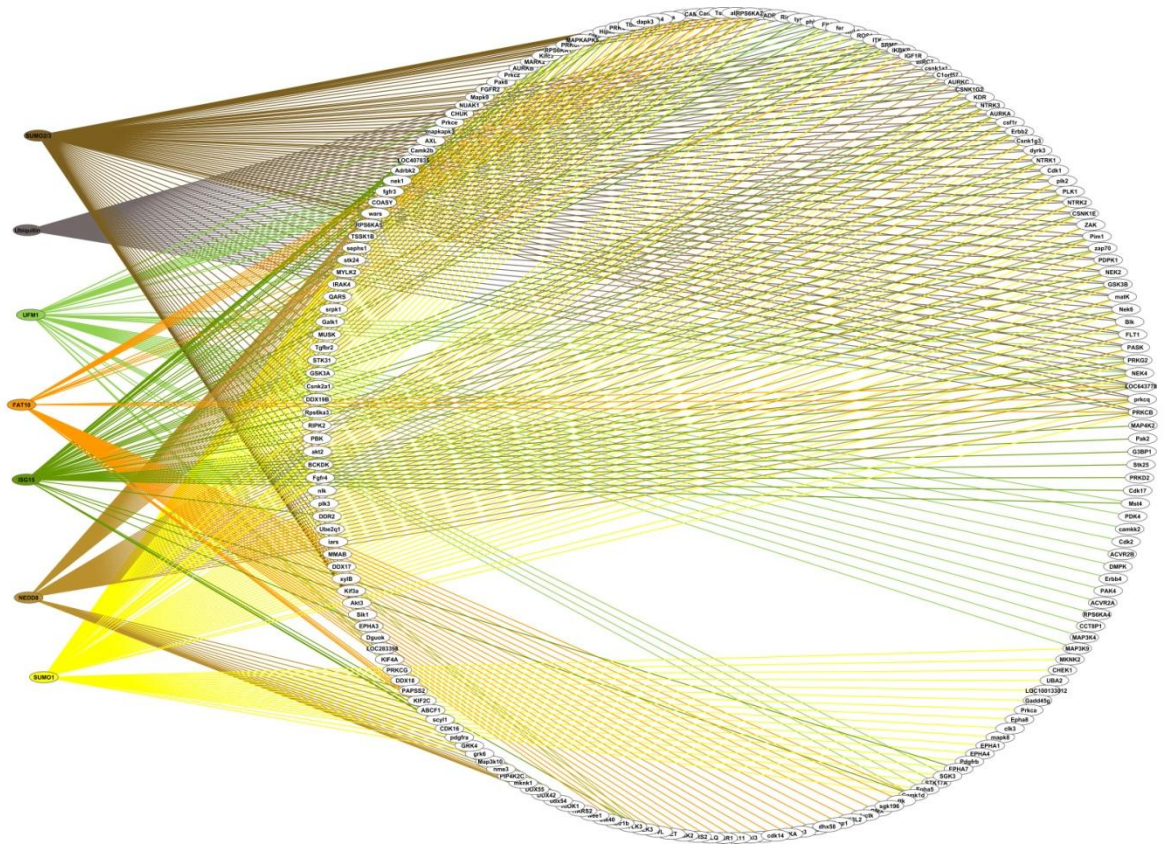

FIGURE S2B

In vitro  
Reaction:

E1 sumo + + +  
Ubc9 + + + +  
Sumo1 + + + +  
Sumo2/3 + + + +

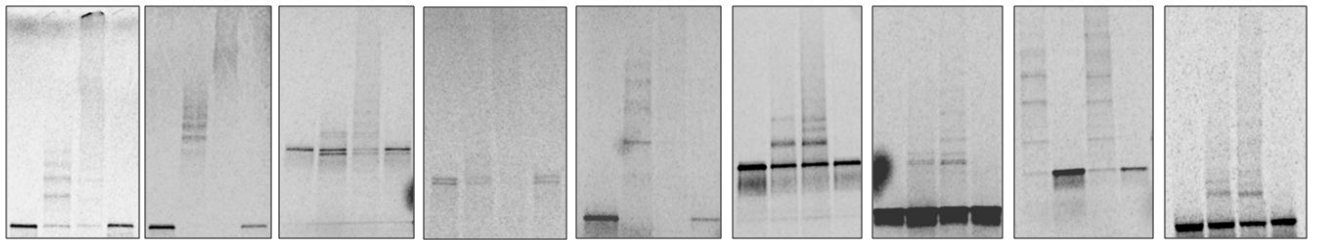

<sup>35</sup>S Substrate:

0 2 2 2 0 2 2 2 0 2 2 2 0 2 2 2 0 2 2 2 0 2 2 2 0 2 2 2 0 2 2 2 0 2 2 2 (Hours)

Supplement: NIHMS481761-supplement-s2.pdf [file NIHMS481761-supplement-s2.pdf]

**FIGURE S6**

**A**

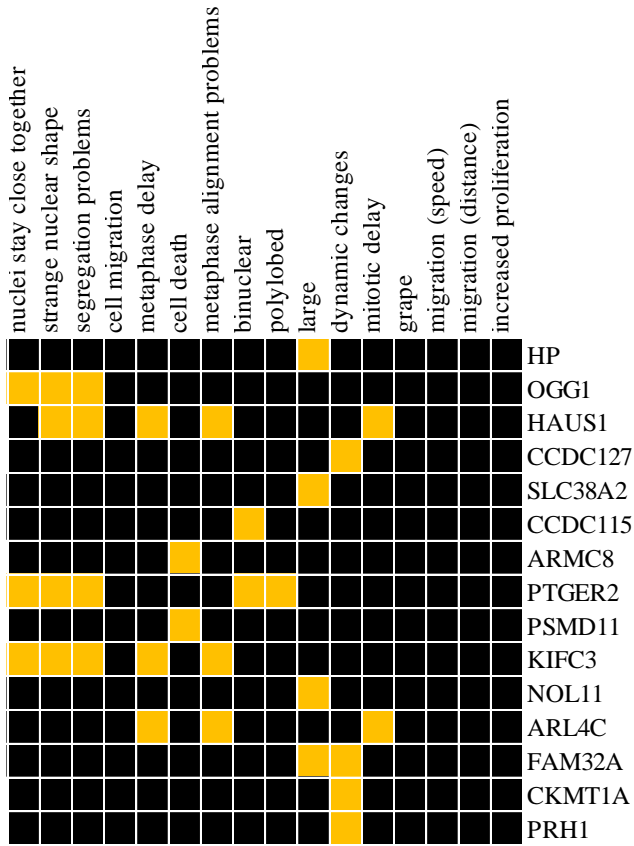

**B**

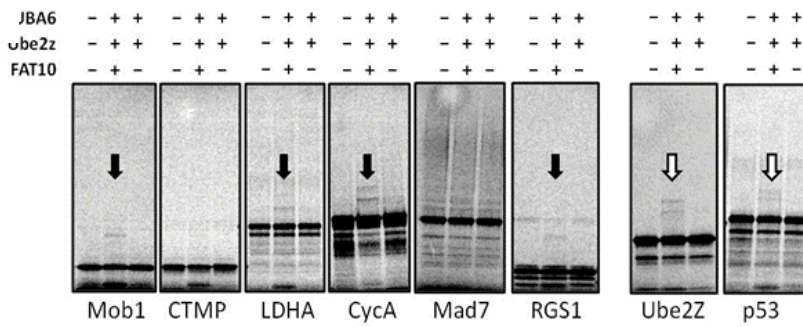

**C**

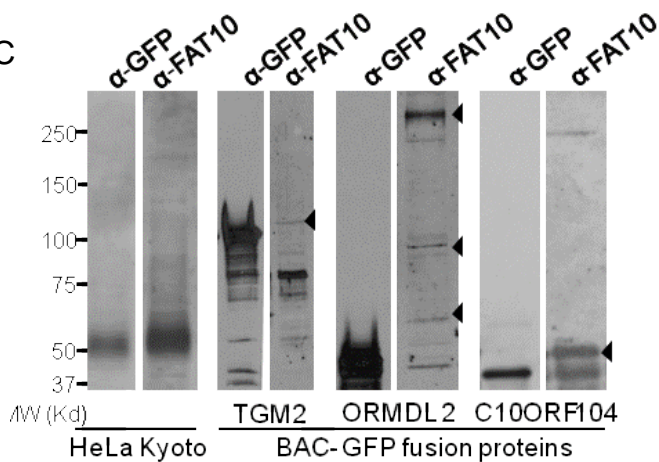

Supplement: NIHMS481761-supplement-s6.pdf [file NIHMS481761-supplement-s6.pdf]

**FIGURE S7**

**A**

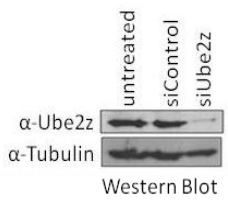

**B**

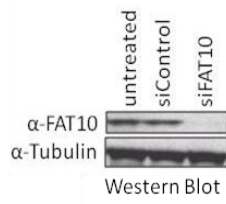

**C**

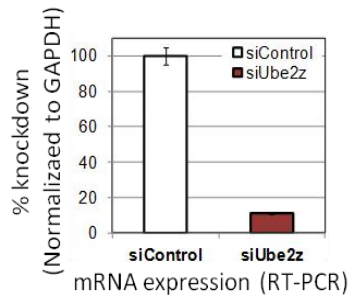

**D**

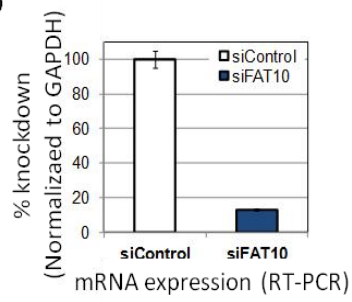

**E**

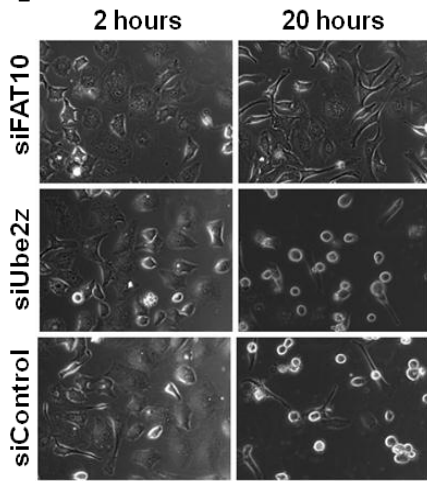

**F**

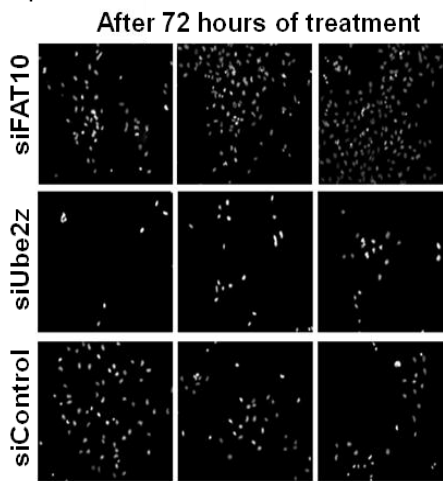

**G**

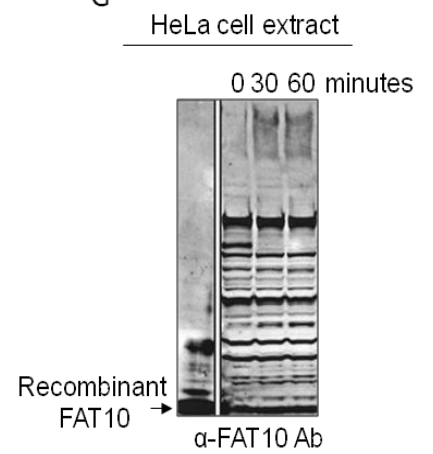

Supplement: NIHMS481761-supplement-s7.pdf [file NIHMS481761-supplement-s7.pdf]
